# Supplementary material for: Flexible self-powered solar-blind Schottky photodetectors based on individual Ga2O3 microwire/MXene junctions
Source: Royal Society of Chemistry journal article supplement (doi:10.1039/d3ce00620d), 2023-01-01
Supplement: d3ce00620d1.pdf [file d3ce00620d1.pdf]

# Supporting information

## Flexible self-powered solar-blind Schottky photodetectors based on individual Ga<sub>2</sub>O<sub>3</sub> microwire/MXene junction

Yang Liu,<sup>a</sup> Yun Wei,<sup>b</sup> Shulin Sha,<sup>b</sup> Zhiming Zhou,<sup>a</sup> Bingwang Yang,<sup>b</sup> Kai Tang,<sup>b</sup> Caixia Kan,<sup>b</sup> Peng Wan,<sup>b,\*</sup> Mingming Jiang<sup>b,\*</sup>

<sup>a</sup> Aviation University of Air Force, Changchun 130022, P. R. China

<sup>b</sup> College of Physics, MIIT Key Laboratory of Aerospace Information Materials and Physics, Key Laboratory for Intelligent Nano Materials and Devices, Nanjing University of Aeronautics and Astronautics, Nanjing 211106, P. R. China.

\*E-mail: pengwan919@nuaa.edu.cn; mmjiang@nuaa.edu.cn.

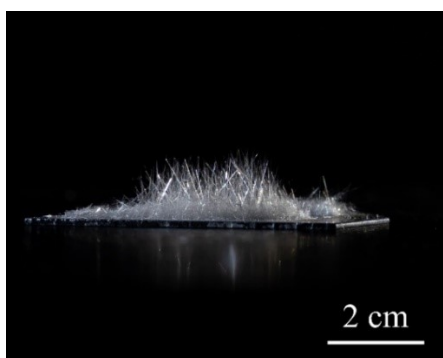

**Fig. S1** Optical image of the Ga<sub>2</sub>O<sub>3</sub> MW.

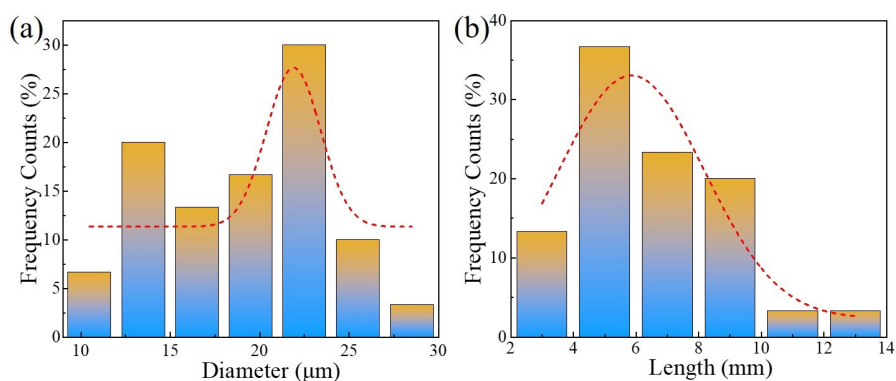

**Fig. S2** (a) Diameter and (b) length distribution histograms of the CVD-synthesized Ga<sub>2</sub>O<sub>3</sub> MWs.

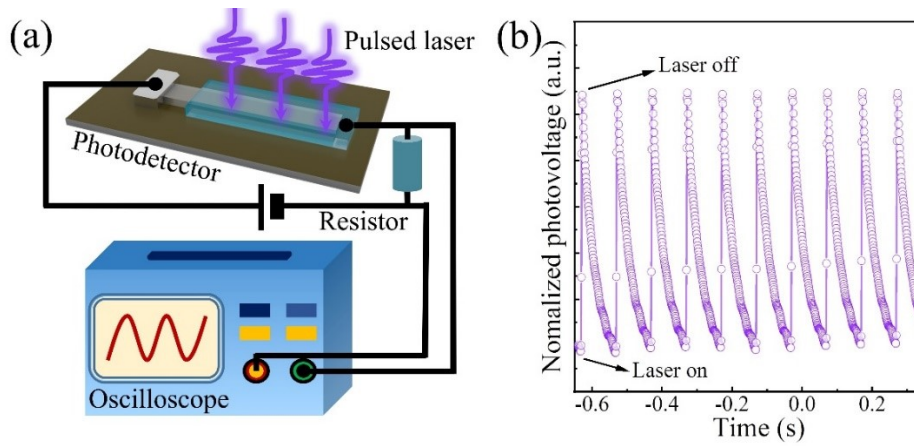

**Fig. S3** (a) Schematic diagram of the experimental setup for testing the time response of the photodetector. (b) Time-resolved response of the  $\text{Ga}_2\text{O}_3$  MW/MXene heterojunction under the excitation of 254 nm nanosecond pulse laser under zero bias.

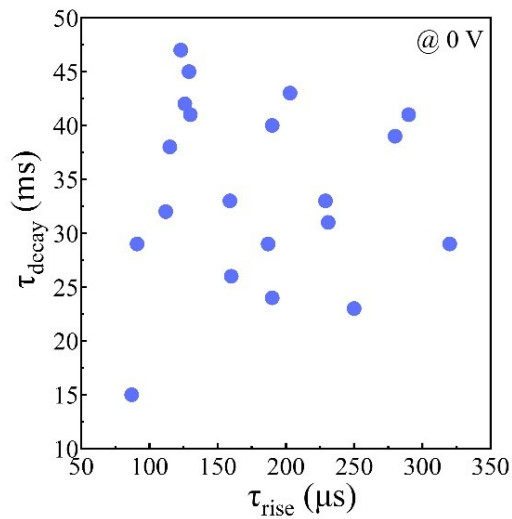

**Fig. S4** (a) Rise time ( $\tau_{\text{rise}}$ ) and decay time ( $\tau_{\text{decay}}$ ) of the twenty  $\text{Ga}_2\text{O}_3$  MW/MXene photodetectors.

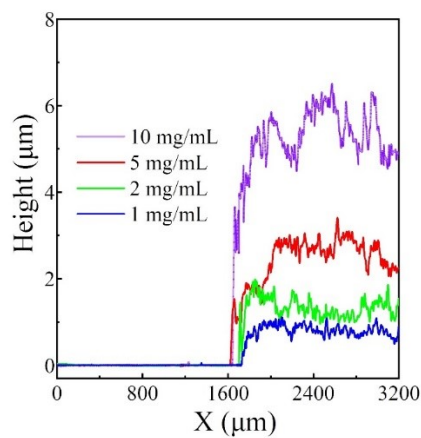

**Fig. S5** Height profile of MXene films fabricated by different concentrations of the MXene solution.

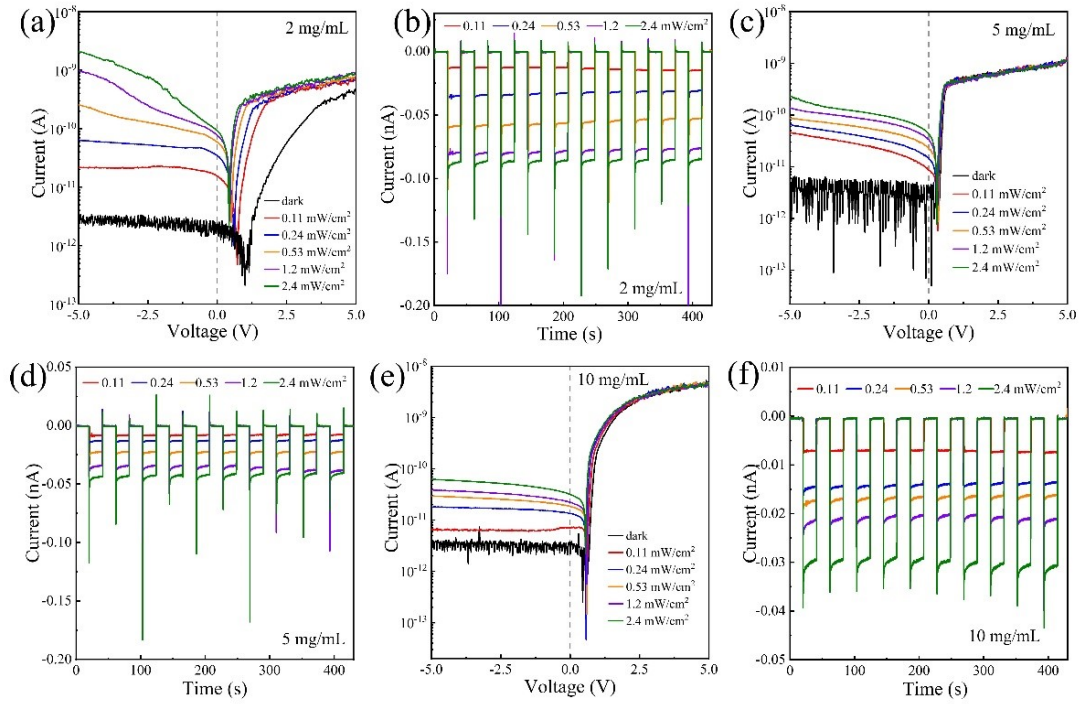

**Fig. S6** (a) Logarithmic  $I$ - $V$  curves of the photodetector fabricated by MXene solution (2 mg/mL). (b)  $I$ - $T$  curves of the photodetector fabricated by MXene solution (2 mg/mL) at 0 V bias. (c) Logarithmic  $I$ - $V$  curves of the photodetector fabricated by MXene solution (5 mg/mL). (d)  $I$ - $T$  curves of the photodetector fabricated by MXene solution (5 mg/mL) at 0 V bias. (e) Logarithmic  $I$ - $V$  curves of the photodetector fabricated by MXene solution (10 mg/mL). (f)  $I$ - $T$  curves of the photodetector fabricated by MXene solution (10 mg/mL) at 0 V bias.

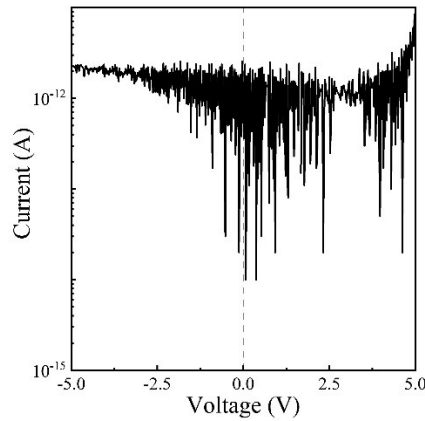

**Fig. S7**  $I$ - $V$  characteristic curve of the photodetector that was fabricated by the MXene solution with lower concentration.
